# Supplementary material for: From theory to practice: a participatory HR-led training programme for employee wellbeing
Source: Frontiers journal article supplement (doi:10.3389/forgp.2025.1624518), 2025-08-18
Supplement: Data_Sheet_1.docx [file Data_Sheet_1.docx]

# Supplement 1

Comparison of ENGAGE and *ENHANCE* by Kushlev et al. (2017) (author’s own construction)

| Feature | Kushlev et al. (2017) | ENGAGE |
| --- | --- | --- |
| Population | Non-clinical general adult population | Working professionals in corporate settings |
| Delivery | By clinical psychologists | By HR/trainer |
| Training Format | Weekly sessions (3 months) + biweekly follow-ups | Recommended- 1 day (8 hours), can be spread over multiple days |
| Participant Incentives | Paid participants | Voluntary participation |
| Programme Focus | Theoretical and skill-based | Skill-building tailored to workplace and culture |
| Construct Selection | Predefined 10 principles by researchers | Co-developed with participants (25 constructs discussed) |
| Customization | One-size-fits-all model | Culturally contextualised and employee-driven |
| Survey Intervals | Pre, 3 months, 6 months | Pre, post, 3–6 months follow-up |
| Number of Instruments Used | 21 instruments | Recommended- WEMWBS for all and Semi-structured interviews with few |
| Skill-Building Focus | Yes | Yes |
| Theoretical Basis | CBT, Positive Psychology, Hedonic/Eudaimonic models | JD-R, SDT, PERMA |
| Maintenance Phase | Yes (3-month follow-up with selected content) | No Follow up sessions |

# Supplement 2

# Comparison of ENGAGE and *Exploring What Matters* by Krekel et al. (2021) (author’s own construction)

| Dimension | Krekel et al. (2021) | ENGAGE Program |
| --- | --- | --- |
| Population | General adult population (local communities, global) | Working professionals (South Africa) |
| Facilitators | Lay volunteers (non-experts) | HR trainer |
| Design Approach | Top-down; manualised and standardised | Bottom-up; co-developed with participants |
| Session Format | 8 weekly sessions (2–2.5 hours each) | Recommended- 1 day (8 hours), can be spread over multiple days |
| Construct Selection | Predefined themes linked to well-being research | Voted by participants (from 25 introduced in pilot) |
| Programme Focus | General well-being, meaning, pro-social behaviour | Workplace relevance, contextual & cultural fit |
| Theoretical Basis | Self-Determination Theory | JD-R, SDT, PERMA |
| Skill Building | Yes | Yes |
| Incentives | Voluntary, with optional donation | Voluntary participation |

# Supplement 3

Comparison of ENGAGE and *Inspired Life Programme* by Appiah et al. (2021) (author’s own construction)

| Dimension | Appiah et al. (2021) | ENGAGE Program |
| --- | --- | --- |
| Population | Rural, low-income adults in Ghana | Working professionals- South Africa |
| Facilitators | Psychology graduates (trained) | HR trainer/researcher-led |
| Design Approach | Community-based participatory (CBPR) + theory-driven | Bottom-up; co-developed with participants |
| Theoretical Framework | Positive Psychology + CBT, MRC Framework | JD-R, SDT, PERMA |
| Customization | High; tailored to cultural and contextual needs | High; based on participant input and workplace realities |
| Construct Selection | Thematic, guided by literature + community feedback | Selected by participants after pilot discussions |
| Skill Building | Yes | Yes |
| Peer Dialogue Component | Strong (group reflections, case work, local idioms) | Moderate (group discussions in training) |
| Cost to Participants | Free; received small tokens (soap, sugar, etc.) | Free; no incentives |
| Delivery Mode | In-person group setting | In-person and online |

# Supplement 4

Comparison of ENGAGE and *Happify* by Parks et al. (2018) (author’s own construction)

| Dimension | Parks et al. (2018) | ENGAGE Program |
| --- | --- | --- |
| Population | General public (self-selected users) | Corporate employees-South Africa |
| Facilitators | Fully automated; no human facilitator | Delivered by HR trainer/researcher |
| Delivery Mode | Online/web/mobile platform | In-person and Online sessions |
| Theoretical Framework | Positive Psychology, CBT, MBSR | JD-R, SDT, PERMA |
| Customization | Personalized tracks based on user goals | Constructs chosen by participants in pilot phase |
| Construct Selection | Predefined from 60+ tracks (e.g., gratitude, savouring) | Participants voted on preferred constructs (25 introduced) |
| Skill Building Focus | Yes | Yes |
| Incentives Offered | $5 gift card for assessment participation | Voluntary participation, no incentives |

# Supplement 5

The two-day, in-person ENGAGE programme yielded clear and sustained improvements in participants’ mental well-being as measured by the WEMWBS.  In the South African cohort who attended both full days of classroom training (n = 19), mean WEMWBS scores rose from 49.32 at baseline (T1) to 52.05 at three months post-training (T3), and this gain persisted through six months (T4).  A Friedman test across the four time points (T1–T4) was significant (χ² = 11.77, p = .0082), and post-hoc Wilcoxon signed-ranks comparisons confirmed that the increase from T1 to T3 was statistically robust (p = .013), with a large effect size (r ≈ .57), while engagement (UWES) likewise improved significantly (p = .017).
